# Supplementary material
Source: PubMed Central journal article supplement (PMC3665277)

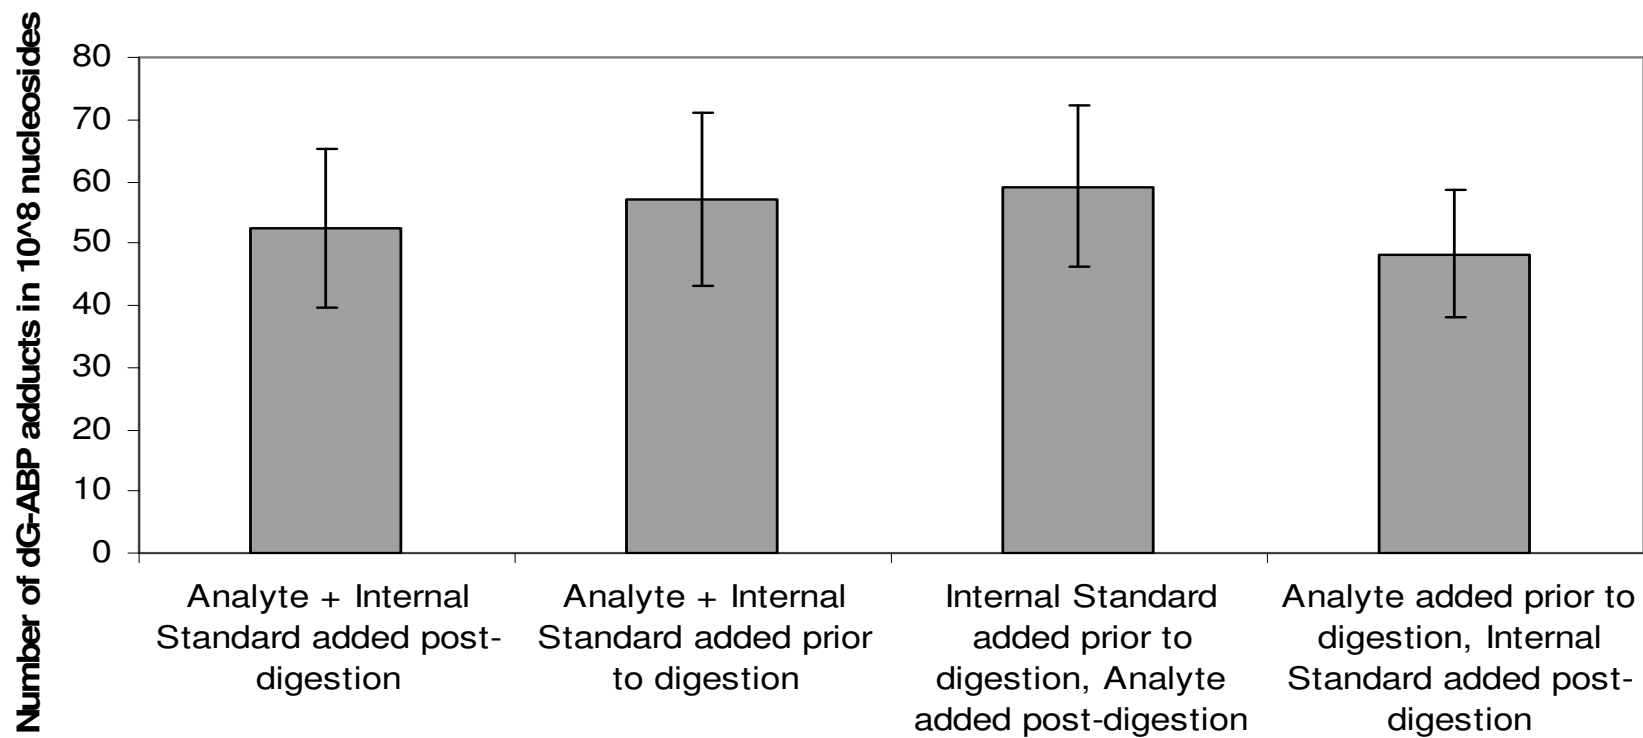

Supplement: NIHMS158176-supplement-1.pdf [file NIHMS158176-supplement-1.pdf]

### Zoom of low end of Standard Curve

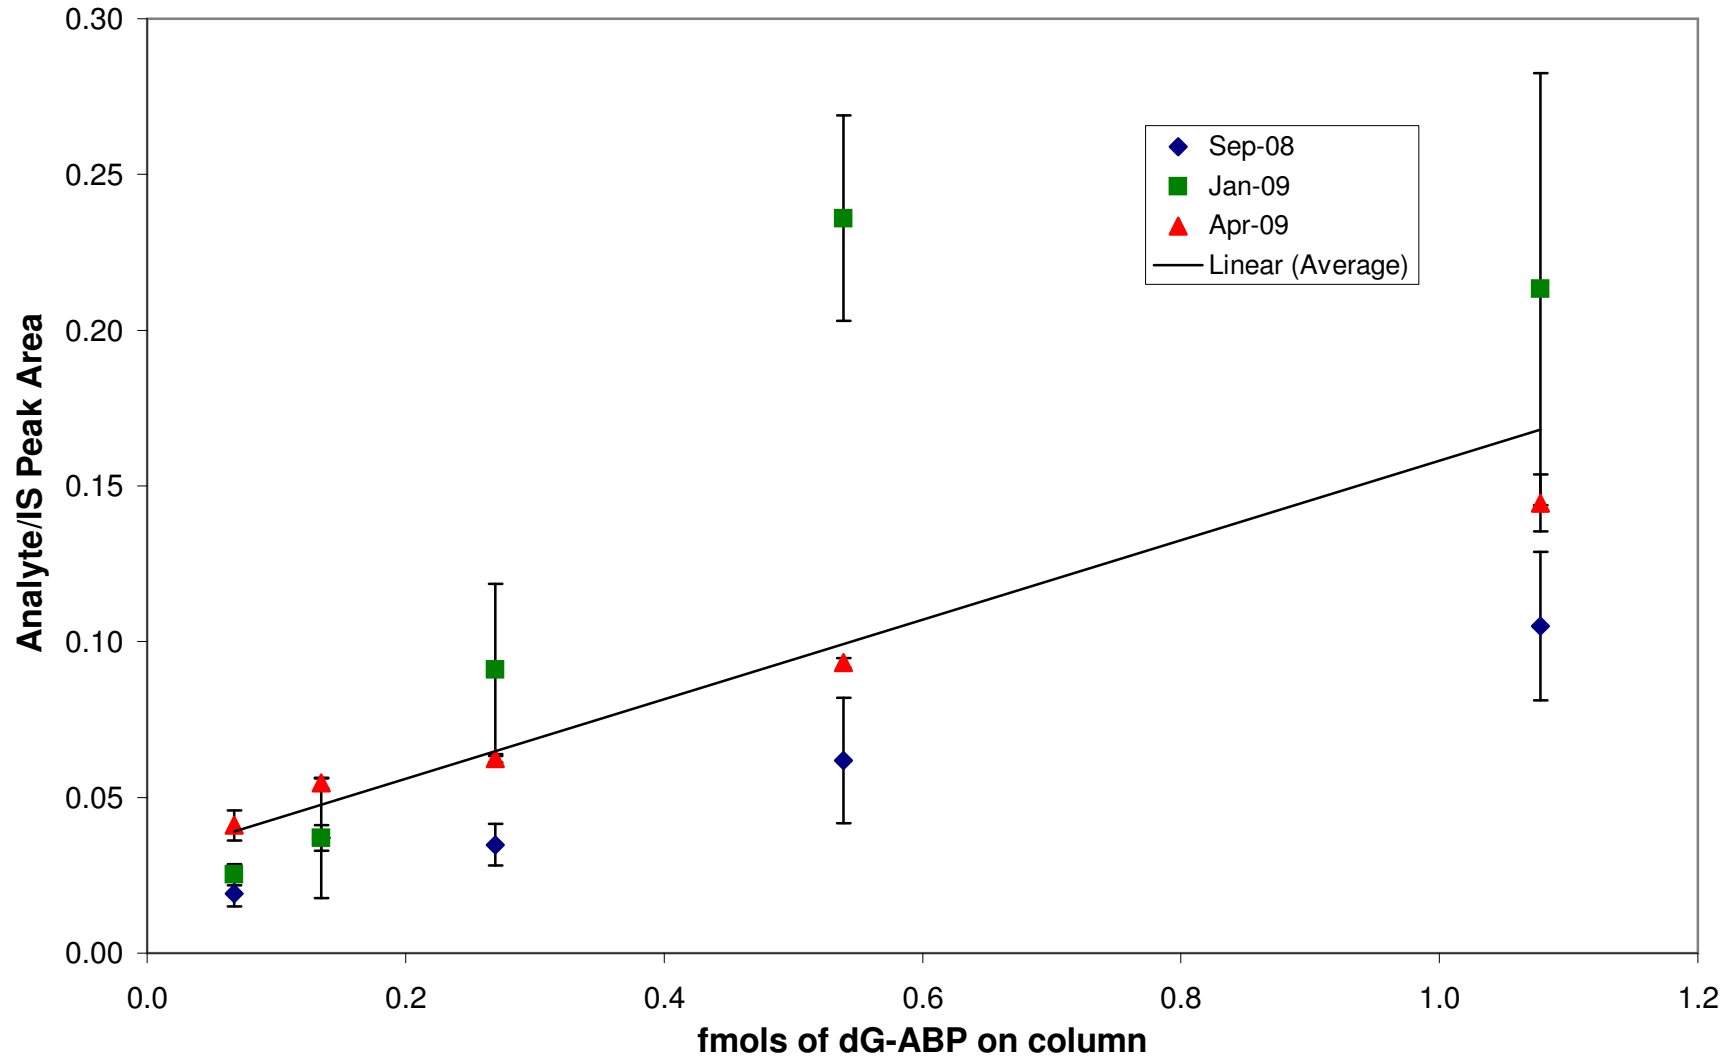

Supplement: NIHMS158176-supplement-2.pdf [file NIHMS158176-supplement-2.pdf]
